# Supplementary material for: Greenness Assessment of Chromatographic Methods Used for Analysis of Empagliflozin: A Comparative Study
Source: MDPI journal article supplement (doi:10.3390/separations9100275), 2022-10-01
Supplement: s1 [file s1]

Supplementary Table S1. *Green analytical procedure index GAPI in details for Empagliflozin analysis*

| <b>1</b> | <b>Category</b>                        | <b>Method</b>                                    |
|----------|----------------------------------------|--------------------------------------------------|
|          | <b><u>Sample preparation</u></b>       |                                                  |
|          | Collection (1)                         | In line (Green)                                  |
|          | Preservation (2)                       | None (Green)                                     |
|          | Transport (3)                          | None (Green)                                     |
|          | Storage (4)                            | Under special condition (Red)                    |
|          | Type of method: Direct or indirect (5) | Extraction (Red)                                 |
|          | Scale of extraction (6)                | Macro-extraction (Red)                           |
|          | Solvents/ reagents used (7)            | Non-green solvents and reagents used (Red)       |
|          | Additional treatments (8)              | Simple treatment (Yellow)                        |
|          | <b><u>Reagent and Solvents</u></b>     |                                                  |
|          | Amount (9)                             | Less than 10 ml (Green)                          |
|          | Health hazard (10)                     | NFPA=2, Moderate toxicity (Yellow)               |
|          | Safety hazard (11)                     | NFPA=3; high flammability (Yellow)               |
|          | <b><u>Instrumentation</u></b>          |                                                  |
|          | Energy (12)                            | >1.5 Kwh per sample (Red)                        |
|          | Occupational hazard (13)               | Hermetic sealing of analytical procedure (Green) |
|          | Waste (14)                             | 1-10 ml (yellow)                                 |
|          | Waste treatment (15)                   | No treatment (Red)                               |

**Figure**

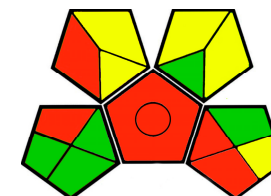

|                 |                                        |                                                  |
|-----------------|----------------------------------------|--------------------------------------------------|
| <b><u>2</u></b> | <b><u>Sample preparation</u></b>       |                                                  |
|                 | Collection (1)                         | In line (Green)                                  |
|                 | Preservation (2)                       | None (Green)                                     |
|                 | Transport (3)                          | None (Green)                                     |
|                 | Storage (4)                            | None (Green)                                     |
|                 | Type of method: Direct or indirect (5) | Simple procedure (Yellow)                        |
|                 | Scale of extraction (6)                | Micro-extraction (Yellow)                        |
|                 | Solvents/ reagents used (7)            | Non-green solvents and reagents used (Red)       |
|                 | Additional treatments (8)              | None (Green)                                     |
|                 | <b><u>Reagent and Solvents</u></b>     |                                                  |
|                 | Amount (9)                             | 10-100 ml (Yellow)                               |
|                 | Health hazard (10)                     | NFPA=2, Moderate toxicity (Yellow)               |
|                 | Safety hazard (11)                     | NFPA=3; high flammability (Yellow)               |
|                 | <b><u>Instrumentation</u></b>          |                                                  |
|                 | Energy (12)                            | <=1.5 Kwh per sample (Yellow)                    |
|                 | Occupational hazard (13)               | Hermetic sealing of analytical procedure (Green) |
|                 | Waste (14)                             | 1-10 ml (yellow)                                 |
|                 | Waste treatment (15)                   | No treatment (Red)                               |
| <b><u>3</u></b> | <b><u>Sample preparation</u></b>       |                                                  |
|                 | Collection (1)                         | In line (Green)                                  |
|                 | Preservation (2)                       | None (Green)                                     |
|                 | Transport (3)                          | None (Green)                                     |
|                 | Storage (4)                            | None (Green)                                     |
|                 | Type of method: Direct or indirect (5) | No sample preparation (Green)                    |
|                 | Scale of extraction (6)                | Micro-extraction (Yellow)                        |
|                 | Solvents/ reagents used (7)            | Non-green solvents and reagents used (Red)       |

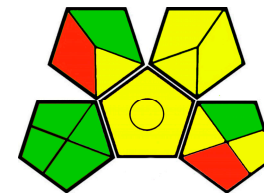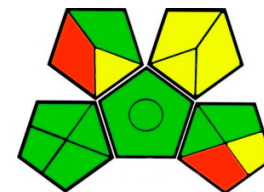

Additional treatments (8)

**Reagent and Solvents**

Amount (9)

Health hazard (10)

Safety hazard (11)

**Instrumentation**

Energy (12)

Occupational hazard (13)

Waste (14)

Waste treatment (15)

None (Green)

10-100 ml (Yellow)

NFPA=2, Moderate toxicity  
(Yellow)

NFPA=3; high flammability  
(Yellow)

$\leq 0.1$  Kwh per sample (Green)

Hermetic sealing of analytical  
procedure (Green)

$< 1$  ml (Green)

No treatment (Red)

In line (Green)

None (Green)

None (Green)

None (Green)

Simple procedures (Yellow)

Micro-extraction (Yellow)

Non-green solvents and  
reagents used (Red)

None (Green)

10-100 ml (Yellow)

NFPA=2, Moderate toxicity  
(Yellow)

NFPA=3; high flammability  
(Yellow)

$> 1.5$  Kwh per sample (Red)

Hermetic sealing of analytical

**4 Sample preparation**

Collection (1)

Preservation (2)

Transport (3)

Storage (4)

Type of method: Direct or indirect (5)

Scale of extraction (6)

Solvents/ reagents used (7)

Additional treatments (8)

**Reagent and Solvents**

Amount (9)

Health hazard (10)

Safety hazard (11)

**Instrumentation**

Energy (12)

Occupational hazard (13)

Waste (14)

Waste treatment (15)

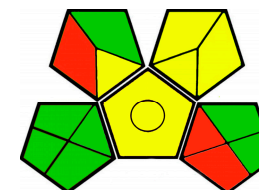

|          |                                                                                                                                                                                                                                                                                                                                                                                                         |                                                                                                                                                                                                                                                                                                                                                                                                                                                                                               |
|----------|---------------------------------------------------------------------------------------------------------------------------------------------------------------------------------------------------------------------------------------------------------------------------------------------------------------------------------------------------------------------------------------------------------|-----------------------------------------------------------------------------------------------------------------------------------------------------------------------------------------------------------------------------------------------------------------------------------------------------------------------------------------------------------------------------------------------------------------------------------------------------------------------------------------------|
| <u>5</u> | Collection (1)<br>Preservation (2)<br>Transport (3)<br>Storage (4)<br>Type of method: Direct or indirect (5)<br>Scale of extraction (6)<br>Solvents/ reagents used (7)<br>Additional treatments (8)<br><u>Reagent and Solvents</u><br>Amount (9)<br>Health hazard (10)<br>Safety hazard (11)<br><u>Instrumentation</u><br>Energy (12)<br>Occupational hazard (13)<br>Waste (14)<br>Waste treatment (15) | procedure (Green)<br><1 ml (Green)<br>No treatment (Red)<br>In line (Green)<br>None (Green)<br>None (Green)<br>None (Green)<br>Simple procedures (Yellow)<br>Micro-extraction (Yellow)<br>Non-green solvents and reagents used (Red)<br>None (Green)<br><br>10-100 ml (Yellow)<br>NFPA=2, Moderate toxicity (Yellow)<br>NFPA=3; high flammability (Yellow)<br><br><=1.5 Kwh per sample (Yellow)<br>Hermetic sealing of analytical procedure (Green)<br>1-10 ml (yellow)<br>No treatment (Red) |
| 6        | Collection (1)<br>Preservation (2)<br>Transport (3)<br>Storage (4)<br>Type of method: Direct or indirect (5)<br>Scale of extraction (6)                                                                                                                                                                                                                                                                 | In line (Green)<br>None (Green)<br>None (Green)<br>None (Green)<br>Simple procedures (Yellow)<br>Micro-extraction (Yellow)                                                                                                                                                                                                                                                                                                                                                                    |

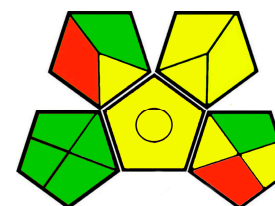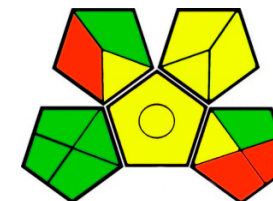

|   |                                        |                                                  |
|---|----------------------------------------|--------------------------------------------------|
|   | Solvents/ reagents used (7)            | Non-green solvents and reagents used (Red)       |
|   | Additional treatments (8)              | None (Green)                                     |
|   | <b><u>Reagent and Solvents</u></b>     |                                                  |
|   | Amount (9)                             |                                                  |
|   | Health hazard (10)                     | 10-100 ml (Yellow)                               |
|   | Safety hazard (11)                     | NFPA=2, Moderate toxicity (Yellow)               |
|   | <b><u>Instrumentation</u></b>          | NFPA=3; high flammability (Yellow)               |
|   | Energy (12)                            |                                                  |
|   | Occupational hazard (13)               |                                                  |
|   | Waste (14)                             |                                                  |
|   | Waste treatment (15)                   | <=1.5 Kwh per sample (Yellow)                    |
|   |                                        | Hermetic sealing of analytical procedure (Green) |
|   |                                        | 1-10 ml (yellow)                                 |
|   |                                        | No treatment (Red)                               |
| 7 | Collection (1)                         | In line (Green)                                  |
|   | Preservation (2)                       | None (Green)                                     |
|   | Transport (3)                          | None (Green)                                     |
|   | Storage (4)                            | None (Green)                                     |
|   | Type of method: Direct or indirect (5) | Simple procedures (Yellow)                       |
|   | Scale of extraction (6)                | Micro-extraction (Yellow)                        |
|   | Solvents/ reagents used (7)            | Non-green solvents and reagents used (Red)       |
|   | Additional treatments (8)              | None (Green)                                     |
|   | <b><u>Reagent and Solvents</u></b>     |                                                  |
|   | Amount (9)                             |                                                  |
|   | Health hazard (10)                     | 10-100 ml (Yellow)                               |
|   | Safety hazard (11)                     | NFPA=2, Moderate toxicity (Yellow)               |
|   | <b><u>Instrumentation</u></b>          | NFPA=3; high flammability (Yellow)               |
|   | Energy (12)                            |                                                  |
|   | Occupational hazard (13)               |                                                  |

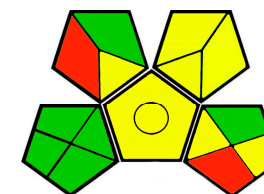

|   |                                        |                                                     |
|---|----------------------------------------|-----------------------------------------------------|
|   | Waste (14)                             |                                                     |
|   | Waste treatment (15)                   | <=1.5 Kwh per sample<br>(Yellow)                    |
|   |                                        | Hermetic sealing of analytical<br>procedure (Green) |
|   |                                        | 1-10 ml (yellow)                                    |
|   |                                        | No treatment (Red)                                  |
| 8 | Collection (1)                         | Off-line (Red)                                      |
|   | Preservation (2)                       | None (Green)                                        |
|   | Transport (3)                          | None (Green)                                        |
|   | Storage (4)                            | Under special condition (Red)                       |
|   | Type of method: Direct or indirect (5) | Simple procedures (Yellow)                          |
|   | Scale of extraction (6)                | Micro-extraction (Red)                              |
|   | Solvents/ reagents used (7)            | Non-green solvents and<br>reagents used (Red)       |
|   | Additional treatments (8)              | Simple treatment (Yellow)                           |
|   | <b><u>Reagent and Solvents</u></b>     |                                                     |
|   | Amount (9)                             |                                                     |
|   | Health hazard (10)                     | Less than 10 ml (Green)                             |
|   | Safety hazard (11)                     | NFPA=2, Moderate toxicity<br>(Yellow)               |
|   | <b><u>Instrumentation</u></b>          |                                                     |
|   | Energy (12)                            | NFPA=3; high flammability<br>(Yellow)               |
|   | Occupational hazard (13)               |                                                     |
|   | Waste (14)                             |                                                     |
|   | Waste treatment (15)                   | >1.5 Kwh per sample (Red)                           |
|   |                                        | Hermetic sealing of analytical<br>procedure (Green) |
|   |                                        | <1 ml (Green)                                       |
|   |                                        | No treatment (Red)                                  |

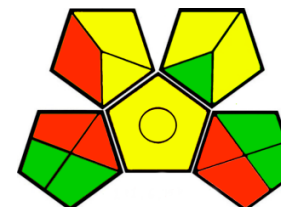

- |                                                                                                                                                                                                                                                                                                                                                                                                                                                                                                       |                                                                                                                                                                                                                                                                                                                                                                                                                                                                                                               |
|-------------------------------------------------------------------------------------------------------------------------------------------------------------------------------------------------------------------------------------------------------------------------------------------------------------------------------------------------------------------------------------------------------------------------------------------------------------------------------------------------------|---------------------------------------------------------------------------------------------------------------------------------------------------------------------------------------------------------------------------------------------------------------------------------------------------------------------------------------------------------------------------------------------------------------------------------------------------------------------------------------------------------------|
| <p>9</p> <p>Collection (1)</p> <p>Preservation (2)</p> <p>Transport (3)</p> <p>Storage (4)</p> <p>Type of method: Direct or indirect (5)</p> <p>Scale of extraction (6)</p> <p>Solvents/ reagents used (7)</p> <p>Additional treatments (8)</p> <p><b><u>Reagent and Solvents</u></b></p> <p>Amount (9)</p> <p>Health hazard (10)</p> <p>Safety hazard (11)</p> <p><b><u>Instrumentation</u></b></p> <p>Energy (12)</p> <p>Occupational hazard (13)</p> <p>Waste (14)</p> <p>Waste treatment (15)</p> | <p>In line (Green)</p> <p>None (Green)</p> <p>None (Green)</p> <p>Under special condition (Red)</p> <p>Extraction (Red)</p> <p>Micro-extraction (Yellow)</p> <p>Non-green solvents and reagents used (Red)</p> <p>None (Green)</p><br><p>Less than 10 ml (Green)</p> <p>NFPA=2, Moderate toxicity (Yellow)</p> <p>NFPA=3; high flammability (Yellow)</p><br><p>&lt;=1.5 Kwh per sample (Yellow)</p> <p>Hermetic sealing of analytical procedure (Green)</p> <p>1-10 ml (yellow)</p> <p>No treatment (Red)</p> |
| <p>10</p> <p>Collection (1)</p> <p>Preservation (2)</p> <p>Transport (3)</p> <p>Storage (4)</p> <p>Type of method: Direct or indirect (5)</p> <p>Scale of extraction (6)</p> <p>Solvents/ reagents used (7)</p> <p>Additional treatments (8)</p> <p><b><u>Reagent and Solvents</u></b></p>                                                                                                                                                                                                            | <p>In line (Green)</p> <p>None (Green)</p> <p>None (Green)</p> <p>Under special condition (Red)</p> <p>Simple procedures (Yellow)</p> <p>Nano-extraction (Green)</p> <p>Non-green solvents and reagents used (Red)</p> <p>None (Green)</p>                                                                                                                                                                                                                                                                    |

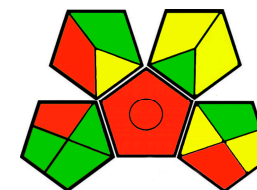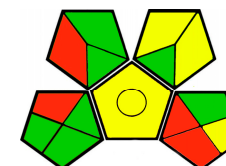

Amount (9)  
 Health hazard (10)  
 Safety hazard (11)  
**Instrumentation**  
 Energy (12)  
 Occupational hazard (13)  
 Waste (14)  
 Waste treatment (15)

Less than 10 ml (Green)  
 NFPA=2, Moderate toxicity  
 (Yellow)  
 NFPA=3; high flammability  
 (Yellow)  
 >1.5 Kwh per sample (Red)  
 Hermetic sealing of analytical  
 procedure (Green)  
 1-10 ml (yellow)  
 No treatment (Red)

11 Collection (1)  
 Preservation (2)  
 Transport (3)  
 Storage (4)  
 Type of method: Direct or indirect (5)  
 Scale of extraction (6)  
 Solvents/ reagents used (7)  
 Additional treatments (8)

In line (Green)  
 None (Green)  
 None (Green)  
 Under special condition (Red)  
 Extraction (Red)  
 Micro-extraction (Yellow)  
 Non-green solvents and  
 reagents used (Red)  
 Simple treatment (Yellow)

**Reagent and Solvents**

Amount (9)  
 Health hazard (10)  
 Safety hazard (11)  
**Instrumentation**  
 Energy (12)  
 Occupational hazard (13)  
 Waste (14)  
 Waste treatment (15)

10-100 ml (Yellow)  
 NFPA=2, Moderate toxicity  
 (Yellow)  
 NFPA=3; high flammability  
 (Yellow)  
 >1.5 Kwh per sample (Red)  
 Hermetic sealing of analytical

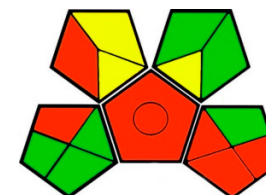



|    |                                        |                                                  |
|----|----------------------------------------|--------------------------------------------------|
|    |                                        | procedure (Green)                                |
|    |                                        | >10 ml                                           |
|    |                                        | (Red)                                            |
|    |                                        | No treatment (Red)                               |
| 12 | Collection (1)                         | In line (Green)                                  |
|    | Preservation (2)                       | None (Green)                                     |
|    | Transport (3)                          | None (Green)                                     |
|    | Storage (4)                            | None (Green)                                     |
|    | Type of method: Direct or indirect (5) | Simple procedures (Yellow)                       |
|    | Scale of extraction (6)                | Micro-extraction (Yellow)                        |
|    | Solvents/ reagents used (7)            | Non-green solvents and reagents used (Red)       |
|    | Additional treatments (8)              | Simple treatment (Yellow)                        |
|    | <b><u>Reagent and Solvents</u></b>     |                                                  |
|    | Amount (9)                             | Less than 10 ml (Green)                          |
|    | Health hazard (10)                     | NFPA=2, Moderate toxicity (Yellow)               |
|    | Safety hazard (11)                     | NFPA=3; high flammability (Yellow)               |
|    | <b><u>Instrumentation</u></b>          |                                                  |
|    | Energy (12)                            |                                                  |
|    | Occupational hazard (13)               |                                                  |
|    | Waste (14)                             |                                                  |
|    | Waste treatment (15)                   |                                                  |
|    |                                        | <=1.5 Kwh per sample (Yellow)                    |
|    |                                        | Hermetic sealing of analytical procedure (Green) |
|    |                                        | 1-10 ml (Yellow)                                 |
|    |                                        | No treatment (Red)                               |

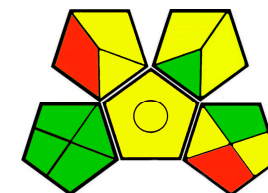

|    |                                        |                                                  |
|----|----------------------------------------|--------------------------------------------------|
| 13 | Collection (1)                         | In line (Green)                                  |
|    | Preservation (2)                       | None (Green)                                     |
|    | Transport (3)                          | None (Green)                                     |
|    | Storage (4)                            | Under special condition (Red)                    |
|    | Type of method: Direct or indirect (5) | Extraction (Red)                                 |
|    | Scale of extraction (6)                | Nano-extraction (Green)                          |
|    | Solvents/ reagents used (7)            | Non-green solvents and reagents used (Red)       |
|    | Additional treatments (8)              | None (Green)                                     |
|    | <b><u>Reagent and Solvents</u></b>     |                                                  |
|    | Amount (9)                             | Less than 10 ml (Green)                          |
|    | Health hazard (10)                     | NFPA=2, Moderate toxicity (Yellow)               |
|    | Safety hazard (11)                     | NFPA=3; high flammability (Yellow)               |
|    | <b><u>Instrumentation</u></b>          |                                                  |
|    | Energy (12)                            | <=1.5 Kwh per sample (Yellow)                    |
|    | Occupational hazard (13)               | Hermetic sealing of analytical procedure (Green) |
|    | Waste (14)                             | 1-10 ml (Yellow)                                 |
|    | Waste treatment (15)                   | No treatment (Red)                               |

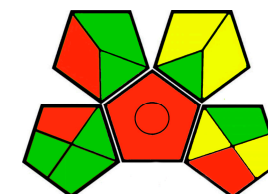

- |                                                                                                                                                                                                                                                                                                                                                                                                                                                                                                        |                                                                                                                                                                                                                                                                                                                                                                                                                                                                                                                      |
|--------------------------------------------------------------------------------------------------------------------------------------------------------------------------------------------------------------------------------------------------------------------------------------------------------------------------------------------------------------------------------------------------------------------------------------------------------------------------------------------------------|----------------------------------------------------------------------------------------------------------------------------------------------------------------------------------------------------------------------------------------------------------------------------------------------------------------------------------------------------------------------------------------------------------------------------------------------------------------------------------------------------------------------|
| <p>14</p> <p>Collection (1)</p> <p>Preservation (2)</p> <p>Transport (3)</p> <p>Storage (4)</p> <p>Type of method: Direct or indirect (5)</p> <p>Scale of extraction (6)</p> <p>Solvents/ reagents used (7)</p> <p>Additional treatments (8)</p> <p><b><u>Reagent and Solvents</u></b></p> <p>Amount (9)</p> <p>Health hazard (10)</p> <p>Safety hazard (11)</p> <p><b><u>Instrumentation</u></b></p> <p>Energy (12)</p> <p>Occupational hazard (13)</p> <p>Waste (14)</p> <p>Waste treatment (15)</p> | <p>In line (Green)</p> <p>None (Green)</p> <p>None (Green)</p> <p>Under special condition (Red)</p> <p>Extraction (Red)</p> <p>Nano-extraction (Green)</p> <p>Non-green solvents and reagents used (Red)</p> <p>Simple treatment (Yellow)</p><br><p>Less than 10 ml (Green)</p> <p>NFPA=2, Moderate toxicity (Yellow)</p> <p>NFPA=3; high flammability (Yellow)</p><br><p>&gt;1.5 Kwh per sample (Red)</p> <p>Hermetic sealing of analytical procedure (Green)</p> <p>1-10 ml (Yellow)</p> <p>No treatment (Red)</p> |
| <p>15</p> <p>Collection (1)</p> <p>Preservation (2)</p> <p>Transport (3)</p> <p>Storage (4)</p> <p>Type of method: Direct or indirect (5)</p> <p>Scale of extraction (6)</p> <p>Solvents/ reagents used (7)</p> <p>Additional treatments (8)</p> <p><b><u>Reagent and Solvents</u></b></p> <p>Amount (9)</p>                                                                                                                                                                                           | <p>In line (Green)</p> <p>None (Green)</p> <p>None (Green)</p> <p>None (Green)</p> <p>Extraction (Red)</p> <p>Micro-extraction (Yellow)</p> <p>Non-green solvents and reagents used (Red)</p> <p>None (Green)</p>                                                                                                                                                                                                                                                                                                    |

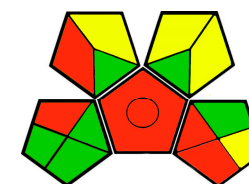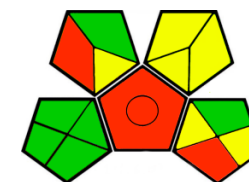

Health hazard (10)  
 Safety hazard (11)  
**Instrumentation**  
 Energy (12)  
 Occupational hazard (13)  
 Waste (14)  
 Waste treatment (15)

10-100 ml (Yellow)  
 NFPA=2, Moderate toxicity  
 (Yellow)  
 NFPA=3; high flammability  
 (Yellow)  
  
 <=1.5 Kwh per sample  
 (Yellow)  
 Hermetic sealing of analytical  
 procedure (Green)  
 1-10 ml (Yellow)  
 No treatment (Red)

16 Collection (1)  
 Preservation (2)  
 Transport (3)  
 Storage (4)  
 Type of method: Direct or indirect (5)  
 Scale of extraction (6)  
 Solvents/ reagents used (7)  
 Additional treatments (8)

In line (Green)  
 None (Green)  
 None (Green)  
 None (Green)  
 Extraction (Red)  
 Micro-extraction (Yellow)  
 Non-green solvents and  
 reagents used (Red)  
 None (Green)

**Reagent and Solvents**

Amount (9)  
 Health hazard (10)  
 Safety hazard (11)  
**Instrumentation**  
 Energy (12)  
 Occupational hazard (13)  
 Waste (14)  
 Waste treatment (15)

10-100 ml (Yellow)  
 NFPA=2, Moderate toxicity  
 (Yellow)  
 NFPA=3; high flammability  
 (Yellow)  
  
 <= 0.1 Kwh per sample  
 (Green)

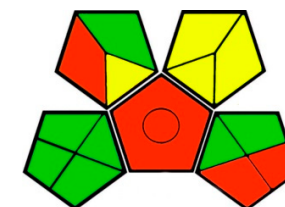

|                                        |                                                  |
|----------------------------------------|--------------------------------------------------|
|                                        | Hermetic sealing of analytical procedure (Green) |
|                                        | >10 ml (Red)                                     |
|                                        | No treatment (Red)                               |
| 17 <b><u>Sample preparation</u></b>    |                                                  |
| Collection (1)                         | In line (Green)                                  |
| Preservation (2)                       | None (Green)                                     |
| Transport (3)                          | None (Green)                                     |
| Storage (4)                            | Simple procedure (Yellow)                        |
| Type of method: Direct or indirect (5) | Micro-extraction (Yellow)                        |
| Scale of extraction (6)                | Non-green solvents and reagents used (Red)       |
| Solvents/ reagents used (7)            | None (Green)                                     |
| Additional treatments (8)              |                                                  |
| <b><u>Reagent and Solvents</u></b>     |                                                  |
| Amount (9)                             | 10-100 ml (Yellow)                               |
| Health hazard (10)                     | NFPA=2, Moderate toxicity (Yellow)               |
| Safety hazard (11)                     | NFPA=3; high flammability (Yellow)               |
| <b><u>Instrumentation</u></b>          |                                                  |
| Energy (12)                            |                                                  |
| Occupational hazard (13)               | <=1.5 Kwh per sample (Yellow)                    |
| Waste (14)                             | Hermetic sealing of analytical procedure (Green) |
| Waste treatment (15)                   | 1-10 ml (yellow)                                 |
|                                        | No treatment (Red)                               |

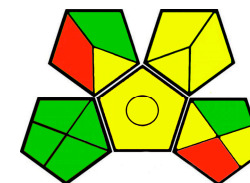

18 **Sample preparation**

Collection (1)  
 Preservation (2)  
 Transport (3)  
 Storage (4)  
 Type of method: Direct or indirect (5)  
 Scale of extraction (6)  
 Solvents/ reagents used (7)  
 Additional treatments (8)

**Reagent and Solvents**

Amount (9)  
 Health hazard (10)  
 Safety hazard (11)

**Instrumentation**

Energy (12)  
 Occupational hazard (13)  
 Waste (14)  
 Waste treatment (15)

In line (Green)  
 None (Green)  
 None (Green)  
 None (Green)  
 Simple procedure (Yellow)  
 Micro-extraction (Yellow)  
 Non-green solvents and  
 reagents used (Red)  
 None (Green)

10-100 ml (Yellow)  
 NFPA=2, Moderate toxicity  
 (Yellow)  
 NFPA=3; high flammability  
 (Yellow)

$\leq 1.5$  Kwh per sample  
 (Yellow)  
 Hermetic sealing of analytical  
 procedure (Green)  
 $>10$  ml (red)  
 No treatment (Red)

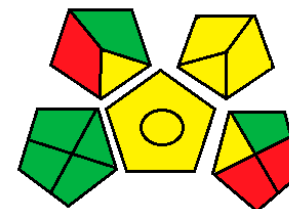

19 **Sample preparation**

Collection (1)  
 Preservation (2)  
 Transport (3)  
 Storage (4)  
 Type of method: Direct or indirect (5)  
 Scale of extraction (6)  
 Solvents/ reagents used (7)  
 Additional treatments (8)

**Reagent and Solvents**

Amount (9)  
 Health hazard (10)  
 Safety hazard (11)

**Instrumentation**

Energy (12)  
 Occupational hazard (13)  
 Waste (14)  
 Waste treatment (15)

In line (Green)  
 None (Green)  
 None (Green)  
 None (Green)  
 Simple procedure (Yellow)  
 Micro-extraction (Yellow)  
 Non-green solvents and reagents used (Red)  
 None (Green)

<10 ml (green)  
 NFPA=2, Moderate toxicity (Yellow)  
 NFPA=3; high flammability (Yellow)

<=1.5 Kwh per sample (Yellow)  
 Hermetic sealing of analytical procedure (Green)  
 1-10 ml (yellow)  
 No treatment (Red)

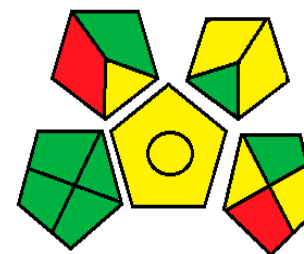

20 **Sample preparation**

Collection (1)  
 Preservation (2)  
 Transport (3)  
 Storage (4)  
 Type of method: Direct or indirect (5)  
 Scale of extraction (6)  
 Solvents/ reagents used (7)

In line (Green)  
 None (Green)  
 None (Green)  
 Under special conditions (Red)  
 Extraction required (red)  
 Nano-extraction (green)  
 green solvents used (Yellow)

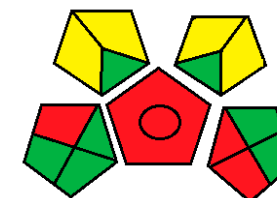

Additional treatments (8)

**Reagent and Solvents**

Amount (9)

Health hazard (10)

Safety hazard (11)

**Instrumentation**

Energy (12)

Occupational hazard (13)

Waste (14)

Waste treatment (15)

Simple treatment(Yellow)

<10 ml (green)

NFPA=2, Moderate toxicity  
(Yellow)

NFPA=3; high flammability  
(Yellow)

>1.5 Kwh per sample (red)

Hermetic sealing of analytical  
procedure (Green)

<1ml (green)

No treatment (Red)

21 **Sample preparation**

Collection (1)

Preservation (2)

Transport (3)

Storage (4)

Type of method: Direct or indirect (5)

Scale of extraction (6)

Solvents/ reagents used (7)

Additional treatments (8)

In line (Green)

None (Green)

None (Green)

Under special conditions (Red)

Extraction required (red)

Nano-extraction (green)

Non-green solvents used (red)

Simple treatment(Yellow)

**Reagent and Solvents**

Amount (9)

<10 ml (green)

NFPA=2, Moderate toxicity

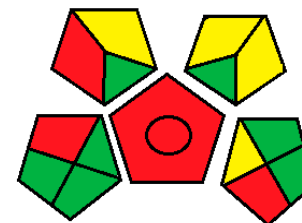



Health hazard (10)

Safety hazard (11)

(Yellow)

NFPA=3; high flammability

(Yellow)

### **Instrumentation**

Energy (12)

Occupational hazard (13)

Waste (14)

Waste treatment (15)

<1.5 Kwh per sample (yellow)

Hermetic sealing of analytical procedure (Green)

<1ml (green)

No treatment (Red)

22

### **Sample preparation**

Collection (1)

Preservation (2)

Transport (3)

Storage (4)

Type of method: Direct or indirect (5)

Scale of extraction (6)

Solvents/ reagents used (7)

Additional treatments (8)

In line (Green)

None (Green)

None (Green)

Under normal conditions (yellow)

Simple procedure (Yellow)

Micro-extraction (Yellow)

Green solvents and reagents used (yellow)

Simple treatments (yellow)

### **Reagent and Solvents**

Amount (9)

<10ml (green)

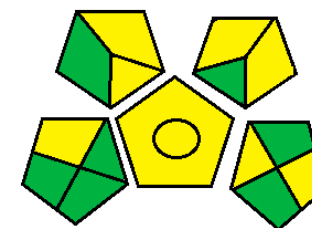

Health hazard (10)  
Safety hazard (11)

NFPA=2, Moderate toxicity  
(Yellow)  
NFPA=3; high flammability  
(Yellow)

**Instrumentation**

Energy (12)  
Occupational hazard (13)  
Waste (14)  
Waste treatment (15)

$\leq 1.5$  Kwh per sample (Yellow)  
Hermetic sealing of analytical  
procedure (Green)  
1-10 ml (yellow)  
recycled (green)

23

**Sample preparation**

Collection (1)  
Preservation (2)  
Transport (3)  
Storage (4)  
Type of method: Direct or indirect (5)  
Scale of extraction (6)  
Solvents/ reagents used (7)  
Additional treatments (8)

In line (Green)  
None (Green)  
None (Green)  
Under normal conditions (yellow)  
Simple procedure (Yellow)  
Micro-extraction (Yellow)  
Green solvents and reagents used  
(yellow)

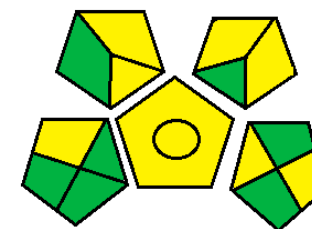

### **Reagent and Solvents**

Amount (9)

Health hazard (10)

Safety hazard (11)

### **Instrumentation**

Energy (12)

Occupational hazard (13)

Waste (14)

Waste treatment (15)

Simple treatments (yellow)

<10ml (green)

NFPA=2, Moderate toxicity  
(Yellow)

NFPA=3; high flammability  
(Yellow)

<=1.5 Kwh per sample (Yellow)

Hermetic sealing of analytical  
procedure (Green)

1-10 ml (yellow)

recycled (green)

24

### **Sample preparation**

Collection (1)

Preservation (2)

Transport (3)

Storage (4)

Type of method: Direct or indirect (5)

Scale of extraction (6)

In line (Green)

None (Green)

None (Green)

Under normal conditions (yellow)

Simple procedure (Yellow)

Micro-extraction (Yellow)



Solvents/ reagents used (7)  
Additional treatments (8)

**Reagent and Solvents**

Amount (9)  
Health hazard (10)  
Safety hazard (11)

**Instrumentation**

Energy (12)  
Occupational hazard (13)  
Waste (14)  
Waste treatment (15)

Green solvents and reagents used  
(yellow)  
Simple treatments (yellow)

<10ml (green)  
NFPA=2, Moderate toxicity  
(Yellow)  
NFPA=3; high flammability  
(Yellow)

<=1.5 Kwh per sample (Yellow)  
Hermetic sealing of analytical  
procedure (Green)  
1-10 ml (yellow)  
recycled (green)

25

**Sample preparation**

Collection (1)  
Preservation (2)  
Transport (3)  
Storage (4)  
Type of method: Direct or indirect (5)  
Scale of extraction (6)

On line (Yellow)  
None (Green)  
None (Green)  
Under normal condition (Yellow)  
Simple procedure (Yellow)  
Micro-extraction (Yellow)

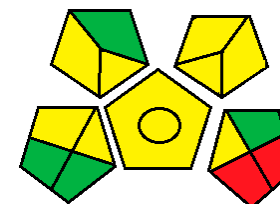

Solvents/ reagents used (7)  
Additional treatments (8)

**Reagent and Solvents**

Amount (9)  
Health hazard (10)  
Safety hazard (11)

**Instrumentation**

Energy (12)  
Occupational hazard (13)  
Waste (14)  
Waste treatment (15)

Green solvents and reagents used  
(yellow)  
None (green)

1-10ml (Yellow)  
NFPA=2, Moderate toxicity  
(Yellow)  
NFPA=3; high flammability  
(Yellow)

$\leq 1.5$  Kwh per sample (Yellow)  
Hermetic sealing of analytical  
procedure (Green)  
>10 ml (red)  
No treatment (Red)

26

**Sample preparation**

Collection (1)  
Preservation (2)  
Transport (3)  
Storage (4)  
Type of method: Direct or indirect (5)  
Scale of extraction (6)

on line (Yellow)  
None (Green)  
None (Green)  
Under normal conditions (yellow)  
Simple procedure (Yellow)  
Micro-extraction (Yellow)

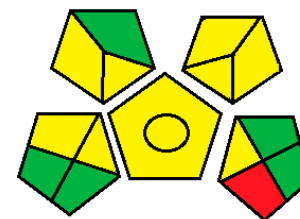

Solvents/ reagents used (7)  
Additional treatments (8)

**Reagent and Solvents**

Amount (9)  
Health hazard (10)  
Safety hazard (11)

**Instrumentation**

Energy (12)  
Occupational hazard (13)  
Waste (14)  
Waste treatment (15)

Green solvents and reagents used  
(yellow)  
None (Green)

>10ml (Yellow)  
NFPA=2, Moderate toxicity  
(Yellow)  
NFPA=3; high flammability  
(Yellow)

$\leq 1.5$  Kwh per sample (Yellow)  
Hermetic sealing of analytical  
procedure (Green)  
<1ml (Green)  
No treatment (Red)
